# Supplementary material for: Characteristics and source apportionment of fine haze aerosol in Beijing during the winter of 2013
Source: Copernicus journal article supplement (doi:10.5194/acp-18-2573-2018), 2018-02-21
Supplement: Supplementary file 1 [file acp-18-2573-2018-supplement.zip]

Archive with 2 entries (2 files):
- Supplementary Information3.pdf
- acp-18-2573-2018-supplement-title-page.pdf
