# Supplementary material for: Characteristics and source apportionment of fine haze aerosol in Beijing during the winter of 2013
Source: Copernicus journal article supplement (doi:10.5194/acp-18-2573-2018), 2018-02-21
Supplement: Supplementary file 1 [file acp-18-2573-2018-supplement.zip › acp-18-2573-2018-supplement-title-page.pdf]

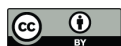

*Supplement of*

**Characteristics and source apportionment of fine haze aerosol in Beijing during the winter of 2013**

**Xiaona Shang et al.**

*Correspondence to:* Kai Zhang ([zhangkai@craes.org.cn](mailto:zhangkai@craes.org.cn)) and Meehye Lee ([meehye@korea.ac.kr](mailto:meehye@korea.ac.kr))

- [acp-18-2573-2018-supplement-title-page.pdf](#)
- [Supplementary Information3.pdf](#)

The copyright of individual parts of the supplement might differ from the CC BY 3.0 License.
