# Supplementary material for: Characteristics and source apportionment of fine haze aerosol in Beijing during the winter of 2013
Source: Copernicus journal article supplement (doi:10.5194/acp-18-2573-2018), 2018-02-21
Supplement: Supplementary file 1 [file acp-18-2573-2018-supplement.zip › Supplementary Information3.pdf]

## Supplement Information

Table SI. The average concentrations of SO<sub>2</sub> and NO<sub>2</sub> and the fraction of major constituents of PM<sub>2.5</sub> in different alert-level haze events

| Event              | SO <sub>2</sub><br>(ppbv) | NO <sub>2</sub><br>(ppbv) | $\frac{\text{SO}_2}{\text{NO}_2}$ | SO <sub>4</sub> <sup>2-</sup><br>(%) | NO <sub>3</sub> <sup>-</sup><br>(%) | Ca <sup>2+</sup> + Mg <sup>2+</sup> + Na <sup>+</sup><br>(%) | Trace<br>elements<br>(%) | Dominant<br>wind |
|--------------------|---------------------------|---------------------------|-----------------------------------|--------------------------------------|-------------------------------------|--------------------------------------------------------------|--------------------------|------------------|
| Total              | 21.1                      | 29.4                      | 0.7                               | 19                                   | 17                                  | 3                                                            | 4                        |                  |
| Non-haze           | 18.7                      | 26.8                      | 0.7                               | 18                                   | 12                                  | 4                                                            | 6                        | Northerly        |
| No/Blue alert haze | 34.3                      | 50.2                      | 0.7                               | 4                                    | 16                                  | 3                                                            | 4                        | Westerly         |
| Orange alert haze  | 33.0                      | 41.8                      | 0.8                               | 18                                   | 25                                  | 2                                                            | 3                        | Southerly        |
| Red alert haze     | 36.9                      | 42.9                      | 0.9                               | 32                                   | 31                                  | 0                                                            | 2                        | Easterly         |
